# Supplementary material for: Epigenetically regulated miR-145 suppresses colon cancer invasion and metastasis by targeting LASP1
Source: PubMed Central journal article supplement (PMC5356582; doi:10.18632/oncotarget.11919), 2016-09-09
Supplement: oncotarget-07-68674-s001.pdf [file oncotarget-07-68674-s001.pdf]

## Epigenetically regulated miR-145 suppresses colon cancer invasion and metastasis by targeting LASP1

### SUPPLEMENTARY TABLES

Supplementary Table S1: Information of CRC patients collected for clinical studies

|                         | Total n=33 (%) |
|-------------------------|----------------|
| <b>Age (years)</b>      |                |
| ≤ 60                    | 21 (63.6)      |
| > 60                    | 12 (36.4)      |
| <b>Gender</b>           |                |
| Female                  | 15 (45.5)      |
| Male                    | 18 (54.5)      |
| <b>Tumor Status</b>     |                |
| T3                      | 18 (54.5)      |
| T4                      | 15 (45.5)      |
| <b>Tumor Metastasis</b> |                |
| Lymphatic               | 29 (87.9)      |
| Hepatic                 | 4 (12.1)       |

Clinical information of the 33 patients whose tissue specimens were collected to investigate the expression levels of miR-145.

Supplementary Table S2: Primers used for qRT-PCR analyses in this study

| Gene           | Forward (5'-3')         | Reverse (5'-3')                                                            |
|----------------|-------------------------|----------------------------------------------------------------------------|
| Hsa-miR-145    | GTCCAGTTTTCCAGGAATCCC   | RR716, SYBR <sup>®</sup> PrimeScript <sup>™</sup> miRNA RT-PCR Kit, TaKaRa |
| U6             | CTCGCTTCGGCAGCACA       | AACGCTTCACGAATTTGCGT                                                       |
| E-cadherin     | TGCCCAGAAAATGAAAAAGG    | GTGTATGTGGCAATGCGTTC                                                       |
| Vimentin       | GAGAACTTTGCCGTTGAAGC    | GCTTCCTGTAGGTGGCAATC                                                       |
| Snail1         | ACAAGCACCAAGAGTCCG      | ATGGCAGTGAGAAGGATGTG                                                       |
| ZEB1           | GACAGTGTTACCAGGGAGGAGCA | TTCAGGTGCCTCAGGAAAAATGA                                                    |
| LASP1          | CCTTCTTCTGCCACTTCTGC    | CAACAGGTCTCCCATTCCAG                                                       |
| $\beta$ -actin | TGGCATCCACGAACTACC      | GTGTTGGCGTACAGGTCTT                                                        |

**Supplementary Table S3: Sequences of the oligonucleotides in this study**

| <b>Oligonucleotides</b> | <b>Sense (5'-3')</b>    | <b>Antisense (5'-3')</b> |
|-------------------------|-------------------------|--------------------------|
| mimic NC/siNC           | UUCUCCGAACGUGUCACGUTT   | ACGUGACACGUUCGGAGAATT    |
| miR-145 mimic           | GUCCAGUUUCCCCAGGAAUCCCU | GGAUUCCUGGGAAAACUGGACUU  |
| inhibitor NC            | CAGUACUUUUGUGUAGUACAA   |                          |
| miR-145 inhibiotr       | AGGGAUUCCUGGGAAAACUGGAC |                          |
| siLASP1(si560)          | CCGAGCUCCAGAGAAUCAATT   | UUGAUUCUCUGGAGCUCGGTT    |
| siLASP1(si788)          | AGUCCUAUGGUGGCUACAATT   | UUGUAGCCACCAUAGGACUTT    |
| siLASP1(si932)          | UCGUCAACGUGCAGCAGAUTT   | AUCUGCUGCACGUUGACGATT    |

Supplementary Table S4: Primers used for construction of plasmids in this study

| Gene          | Plasmid  | Forward (5'-3')                           | Reverse (5'-3')                          |
|---------------|----------|-------------------------------------------|------------------------------------------|
| LASP1         | WT 3'UTR | GGAATTCCTGGGGCAGAGAAGTT                   | CGGATATCCACCCACAGTCTTTTCC                |
|               | MT 3'UTR | GGAATTCTGACAACCTGAACA<br>GCACAGCCTCGGGGAT | CGGATATCCACCCACAGTCTTTTCC                |
| pmiR-145p-F1  |          | TTGAGCTCTGGAAGTGGTAAGTGCTG                | CAGATCTACTTCCCAAGCTTTTGGGGAG             |
| pmiR-145p-F2  |          | TTGAGCTCCAAAAGCTTGGGAAGTGG                | AAGATCTTGTCCTAAGGACCAGCTG                |
| pmiR-145p-F2A |          | TTGAGCTCCAAAAGCTTGGGAAGTGG                | GAAGATCTTCGGGGTACCCC<br>TGAGATGTAAAGA    |
| pmiR-145p-F2B |          | CGAGCTCGGGGGTACCCC<br>TCACTTTTAGCAAAGA    | GAAGATCTTCGCTCTAGAGCG<br>CCAGAGGGGTGGATT |
| pmiR-145p-F2C |          | CGAGCTCGGCTCTAGAGCATGG<br>TTGGTTTAAAT     | AAGATCTTGTCCTAAGGACCAGCTG                |

**Supplementary Table S5: Primer sequences for miR-145 regulatory region analyzed in ChIP assays**

| Sets of primers | Forward (5'-3')      | Reverse (5'-3')       |
|-----------------|----------------------|-----------------------|
| 1               | AACAATGAGCCCTGGAAAGC | GGACTGGTTTCGGCAATACC  |
| 2               | AATGAGCAGCAGAGGAGAGC | GGTCCCAGGTTCCATAATCA  |
| 3               | TTAAAGAAGGCCAAGGCTCA | GGA ACTTCAATTGCCCTGAA |
| 4               | TGCAGAAGAGAACTCCAGCT | CCAGCTGTGAAACCATGACC  |
| 5               | CTTCCCACCCACAGTTG    | AAACGCATGCCTGATGGT    |
